# Supplementary material for: Identifying Better Indicators of Aerosol Wet Scavenging During Long-Range Transport
Source: Copernicus journal article supplement (doi:10.5194/egusphere-2023-726), 2023-05-22
Supplement: Supplementary file 1 [file egusphere-2023-726-supplement.pdf]

# Supplementary Information: Identifying Better Indicators of Aerosol Wet Scavenging During Long-Range Transport

Miguel Ricardo A. Hilario<sup>1</sup>, Avelino F. Arellano<sup>1</sup>, Ali Behrangi<sup>1,2</sup>, Ewan C. Crosbie<sup>3,4</sup>, Joshua P. DiGangi<sup>3</sup>, Glenn S. Diskin<sup>3</sup>, Michael A. Shook<sup>3</sup>, Luke D. Ziemba<sup>3</sup>, and Armin Sorooshian<sup>1,5</sup>

5 <sup>1</sup> Department of Hydrology and Atmospheric Sciences, University of Arizona, Tucson, AZ, USA

<sup>2</sup> Department of Geosciences, University of Arizona, Tucson, AZ, USA

<sup>3</sup> NASA Langley Research Center, Hampton, VA, USA

<sup>4</sup> Science Systems and Applications, Inc., Hampton, VA, USA

<sup>5</sup> Department of Chemical and Environmental Engineering, University of Arizona, Tucson, AZ, USA

10 *Correspondence to:* Armin Sorooshian (armin@arizona.edu)

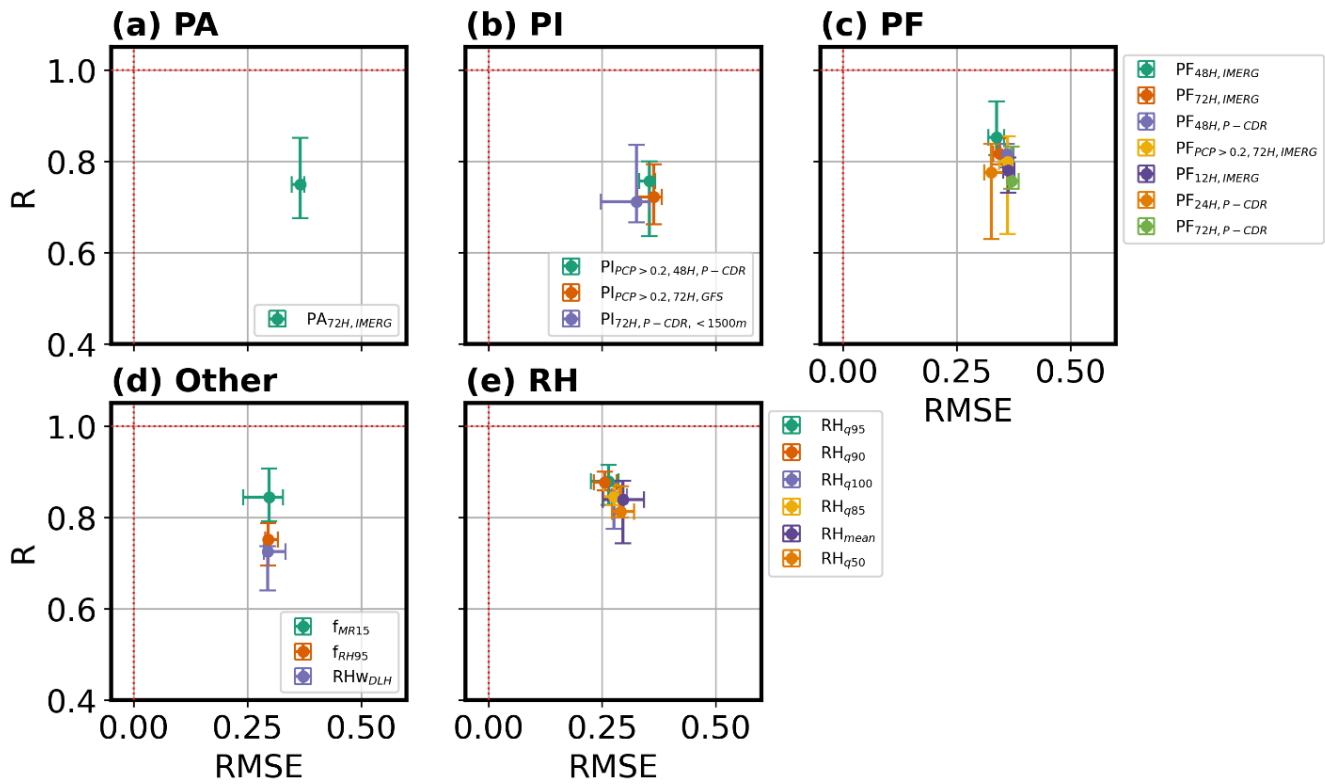

Figure S1: Root mean squared error (RMSE) and Pearson R derived from linear regressions of observed (x) and predicted (y)  $\Delta BC/\Delta CO$  with error bars representing the 25<sup>th</sup> and 75<sup>th</sup> percentile values derived from k-fold cross validation (k=10). Ideal values are denoted by the red dashed lines such that a better predictor would fall closer to the intersection of the two lines. Only predictors with median R > 0.71 are shown. Note that PERSIANN-CDR has been abbreviated to P-CDR (b-c). Panels share the same X- and Y-axis limits.

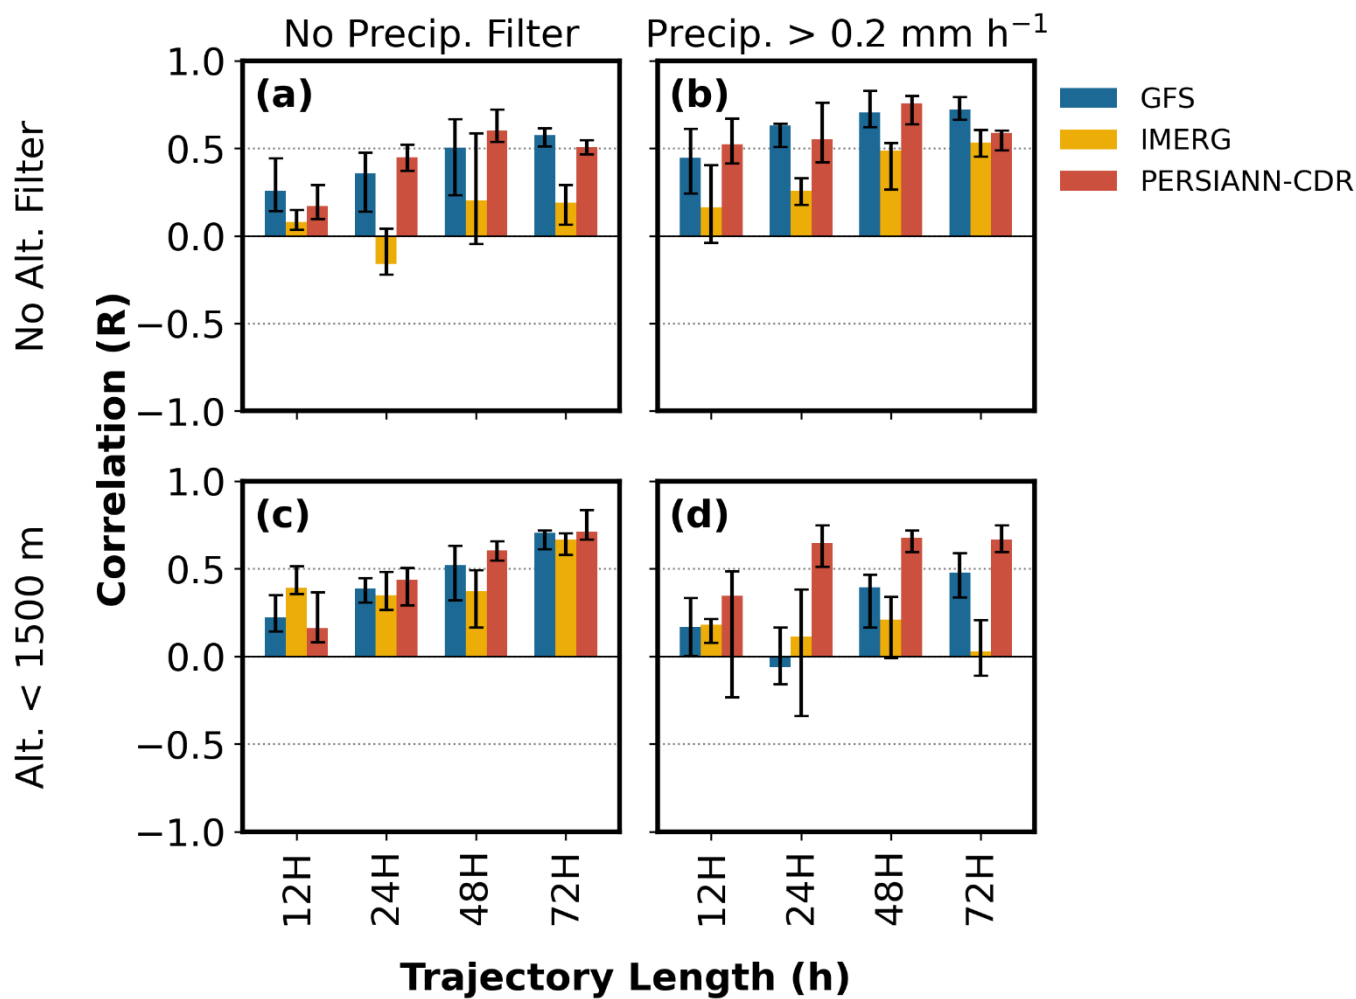

Figure S2: Pearson correlations (R) between observed  $\Delta BC/\Delta CO$  and  $\Delta BC/\Delta CO$  predicted by precipitation intensity (PI) for different trajectory lengths and precipitation data products. Each panel refers to a combination of altitude and precipitation intensity filters. Panels share the same X- and Y-axis limits.

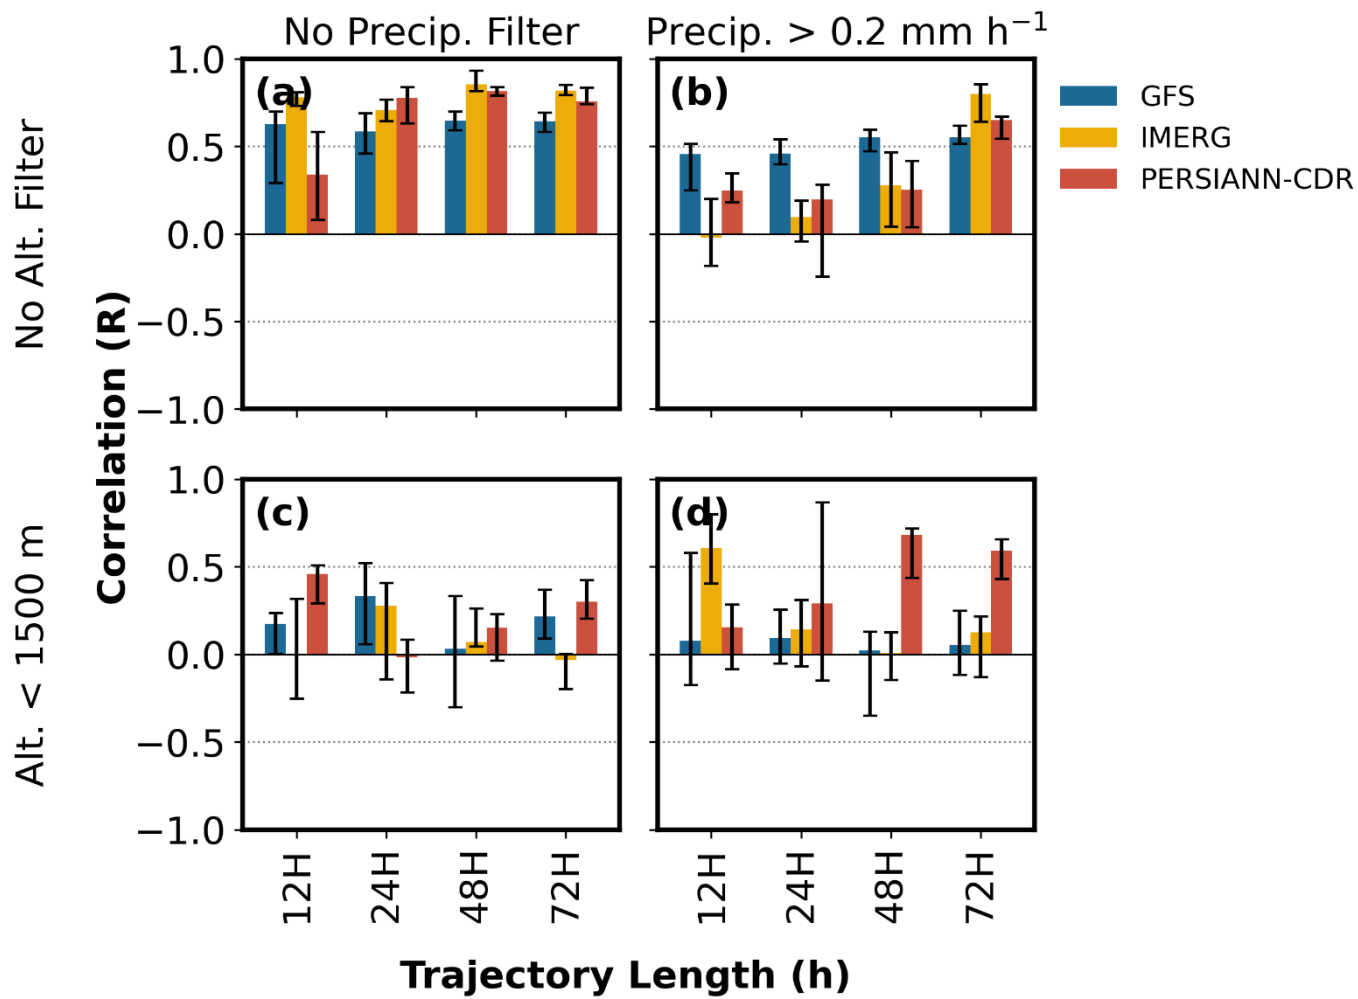

Figure S3: Same as Fig. S2 but for precipitation frequency (PF).

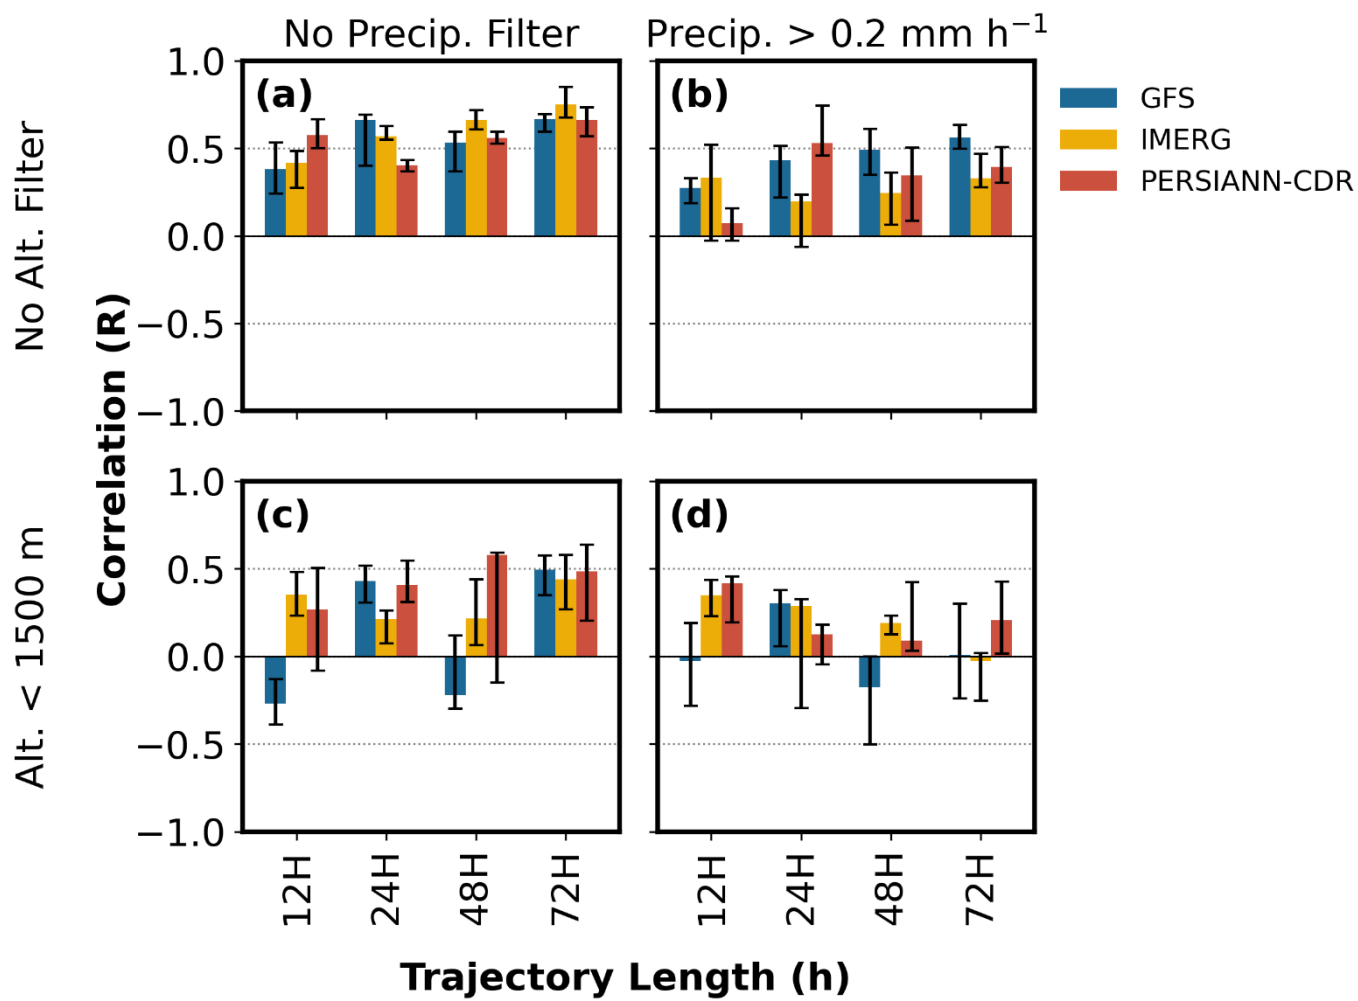

Figure S4: Same as Fig. S2 but for precipitation amount (PA).

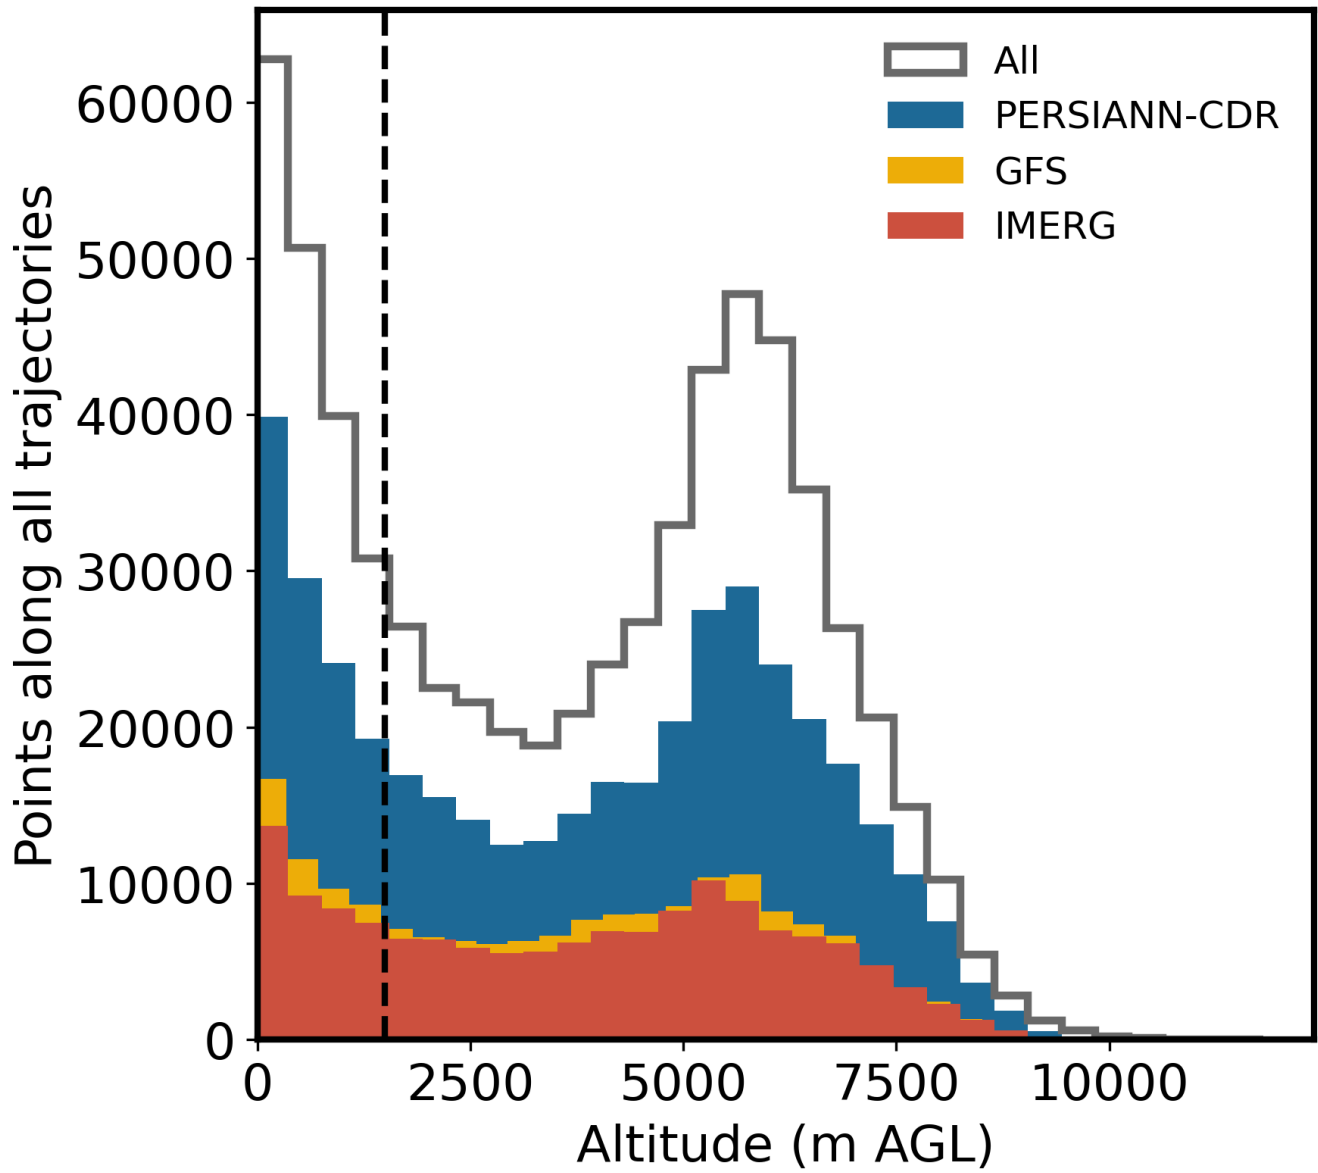

30

Figure S5: Histograms of trajectory altitude (m AGL) for all points along the 72-h backward trajectories (grey) and for points with non-zero precipitation based on PERSIANN-CDR (blue), GFS (yellow), and IMERG (red) (not stacked). The vertical dashed line shows the 1.5 km filter threshold used when calculating precipitation variables (Fig. 5, S2-S4).
